# Supplementary material
Source: MDPI journal article supplement (https://www.mdpi.com/1424-2818/14/11/915)
Supplement: s1 [file s1]

**Table S1.** Environmental variables

| Environment variables    | Description                                                                           | Abbreviation |
|--------------------------|---------------------------------------------------------------------------------------|--------------|
| Climate                  | Annual Mean Temperature (0.1°C)                                                       | bio_1        |
|                          | Mean Diurnal Range Mean Diurnal Range (Mean of monthly (max temp - min temp)) (0.1°C) | bio_2        |
|                          | Isothermality (bio_2/bio_7) (* 100) (%)                                               | bio_3        |
|                          | Temperature Seasonality (standard deviation *100) (0.1°C)                             | bio_4        |
|                          | Max Temperature of Warmest Month (0.1°C)                                              | bio_5        |
|                          | Min Temperature of Coldest Month (0.1°C)                                              | bio_6        |
|                          | Temperature Annual Range (bio_5-bio_6) (0.1°C)                                        | bio_7        |
|                          | Mean Temperature of Wettest Quarter (0.1°C)                                           | bio_8        |
|                          | Mean Temperature of Driest Quarter (0.1°C)                                            | bio_9        |
|                          | Mean Temperature of Warmest Quarter (0.1°C)                                           | bio_10       |
|                          | Mean Temperature of Coldest Quarter (mm)                                              | bio_11       |
|                          | Annual Precipitation (mm)                                                             | bio_12       |
|                          | Precipitation of Wettest Month (mm)                                                   | bio_13       |
|                          | Precipitation of Driest Month (mm)                                                    | bio_14       |
|                          | Precipitation Seasonality (Coefficient of Variation) (%)                              | bio_15       |
|                          | Precipitation of Wettest Quarter (mm)                                                 | bio_16       |
|                          | Precipitation of Driest Quarter (mm)                                                  | bio_17       |
|                          | Precipitation of Warmest Quarter (mm)                                                 | bio_18       |
|                          | Precipitation of Coldest Quarter (mm)                                                 | bio_19       |
| Soil                     | Soil type                                                                             | soil         |
| Soil texture             | sand                                                                                  | sand         |
|                          | silt                                                                                  | silt         |
| Soil quality             | soil                                                                                  | clay         |
|                          | Nutrient availability                                                                 | sq1          |
|                          | Nutrient retention capacity                                                           | sq2          |
|                          | Rooting conditions                                                                    | sq3          |
|                          | Oxygen availability to roots                                                          | sq4          |
|                          | Excess salts                                                                          | sq5          |
|                          | Toxicity                                                                              | sq6          |
|                          | Workability (constraining field management)                                           | sq7          |
| Land Use/Cover Change    | Land Use/Cover Change                                                                 | lucc         |
| Human activity intensity | Human footprint data set                                                              | hii          |
| Terrain                  | Altitude                                                                              | altitude     |
|                          | Slope                                                                                 | slope        |
|                          | Aspect                                                                                | aspect       |
